# Supplementary material
Source: ML conference proceedings conference paper supplement (https://openreview.net/forum?id=26kgSlMmhA)
Supplement: supplementary_material [file attachment]

## ZINC Clean Leads

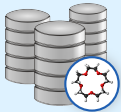

4 591 276  
molecules

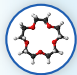

- Macrocycles
- Atom types
- MCF
- PAINS

## MOSES dataset

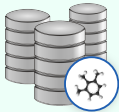

1 936 962  
molecules

  
Training

  
Test

  
Test with new  
scaffolds

## MODELS

Language model

VAE

AAE

LatentGAN

Junction Tree VAE

...

## METRICS

FCD

Diversity

Uniqueness

Validity

...

## LEADERBOARD

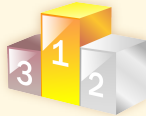

 Contributions

 Contributions
