# Supplementary material
Source: ML conference proceedings conference paper supplement (https://openreview.net/forum?id=26kgSlMmhA)

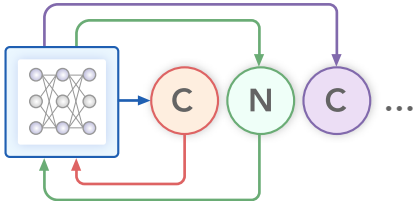

Supplement: supplementary_material [file attachment]

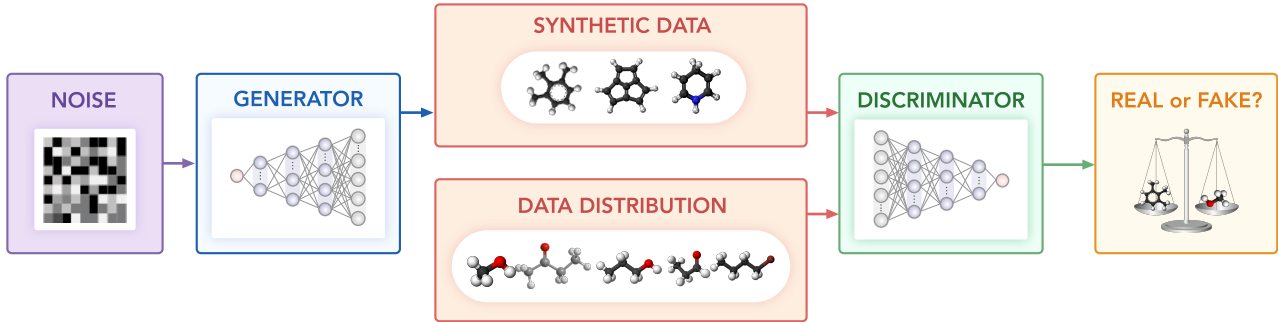

Supplement: supplementary_material [file attachment]

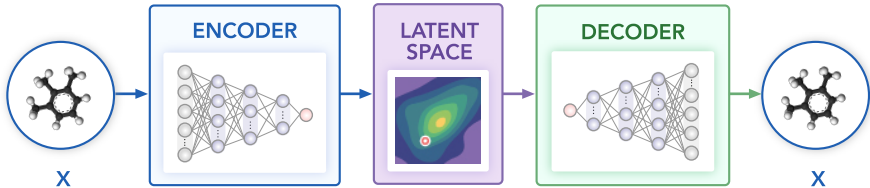

Supplement: supplementary_material [file attachment]

weight

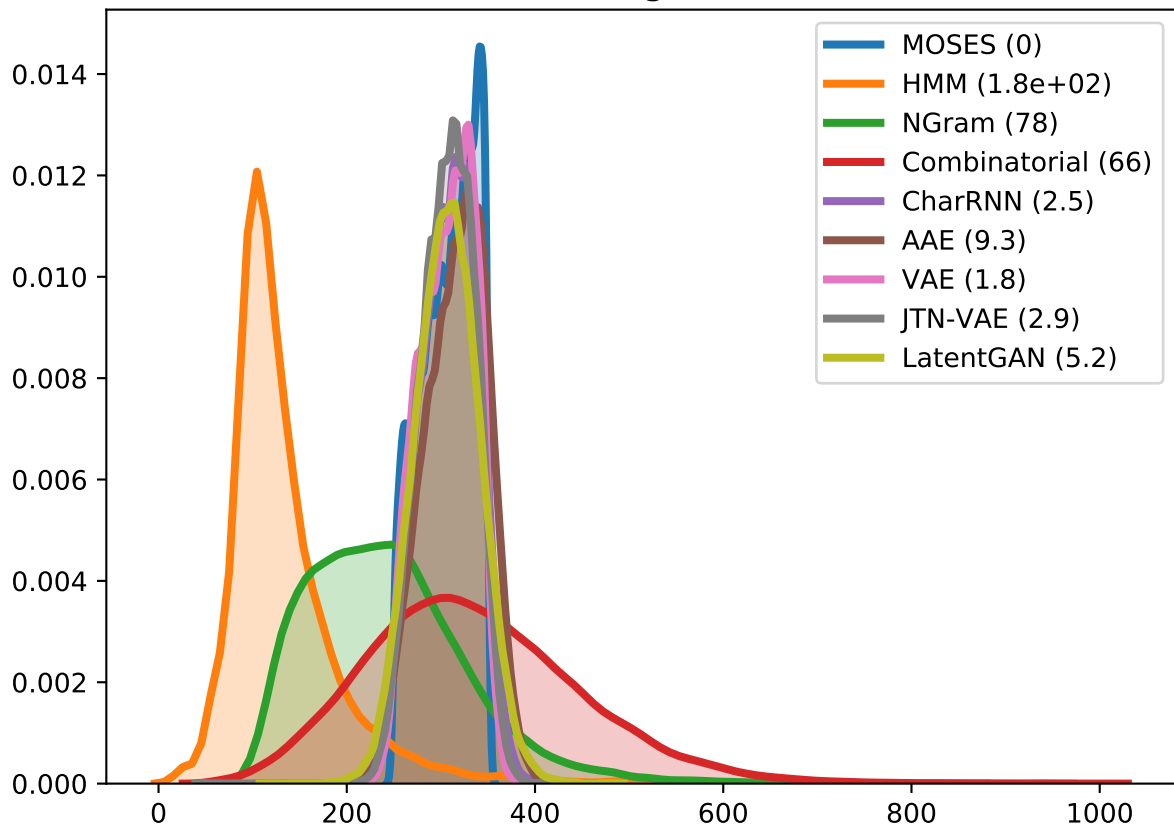

Supplement: supplementary_material [file attachment]

# QED

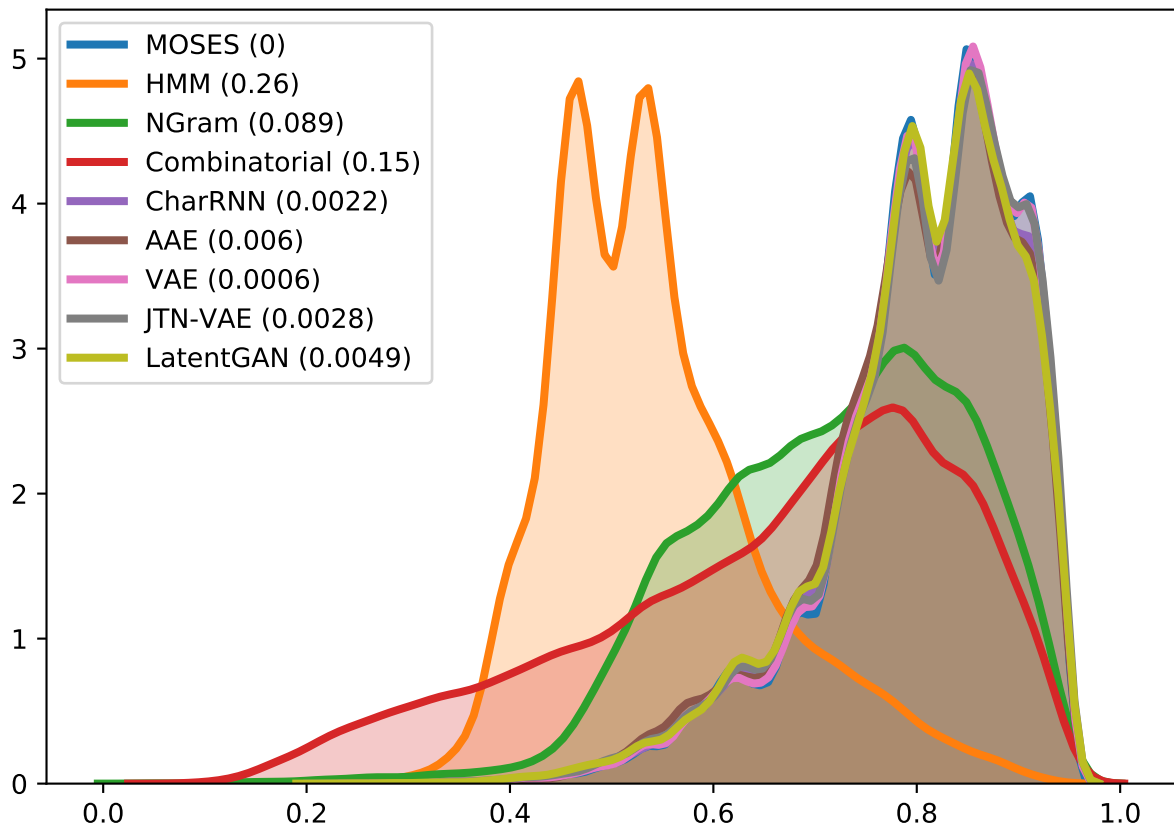

Supplement: supplementary_material [file attachment]

## Fingerprints

00010001000101000...

## Strings

c1(C=O)cc(OC)c(O)cc1

## Graphs

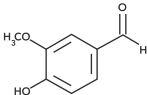

## 3D

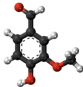

Supplement: supplementary_material [file attachment]

SA

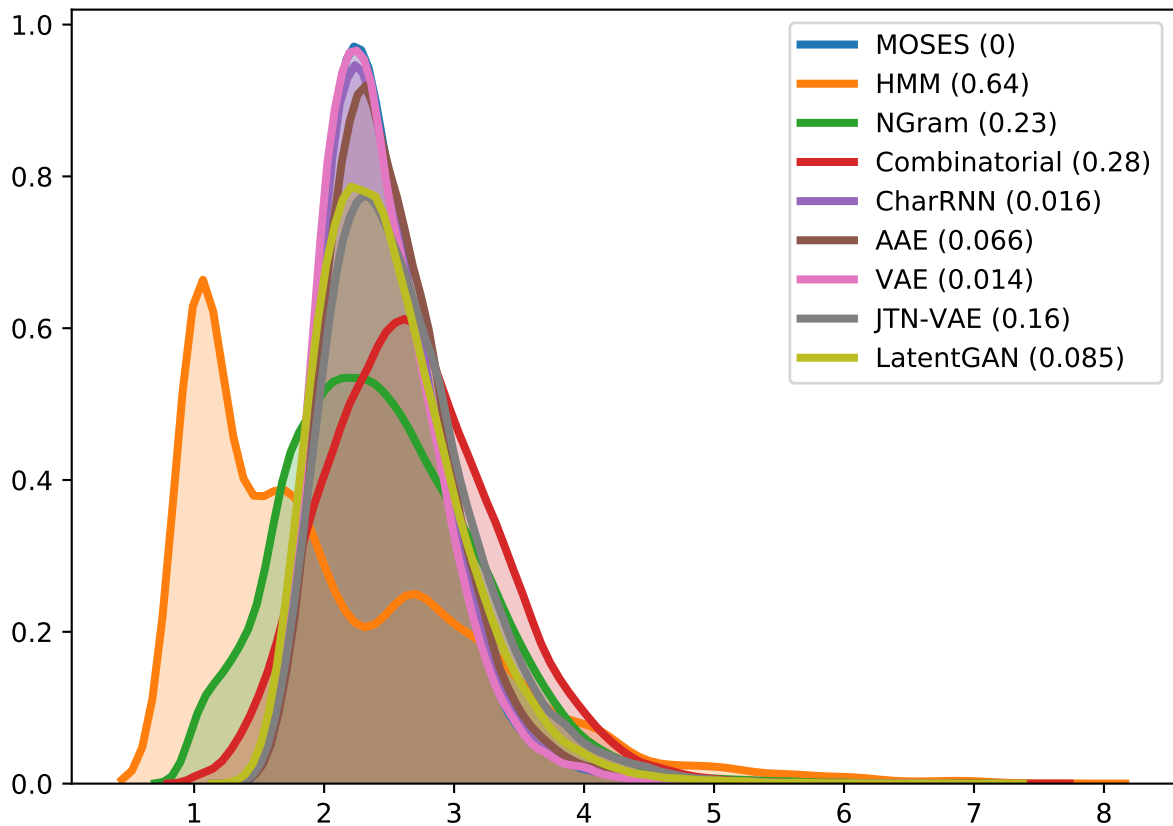

Supplement: supplementary_material [file attachment]

logP

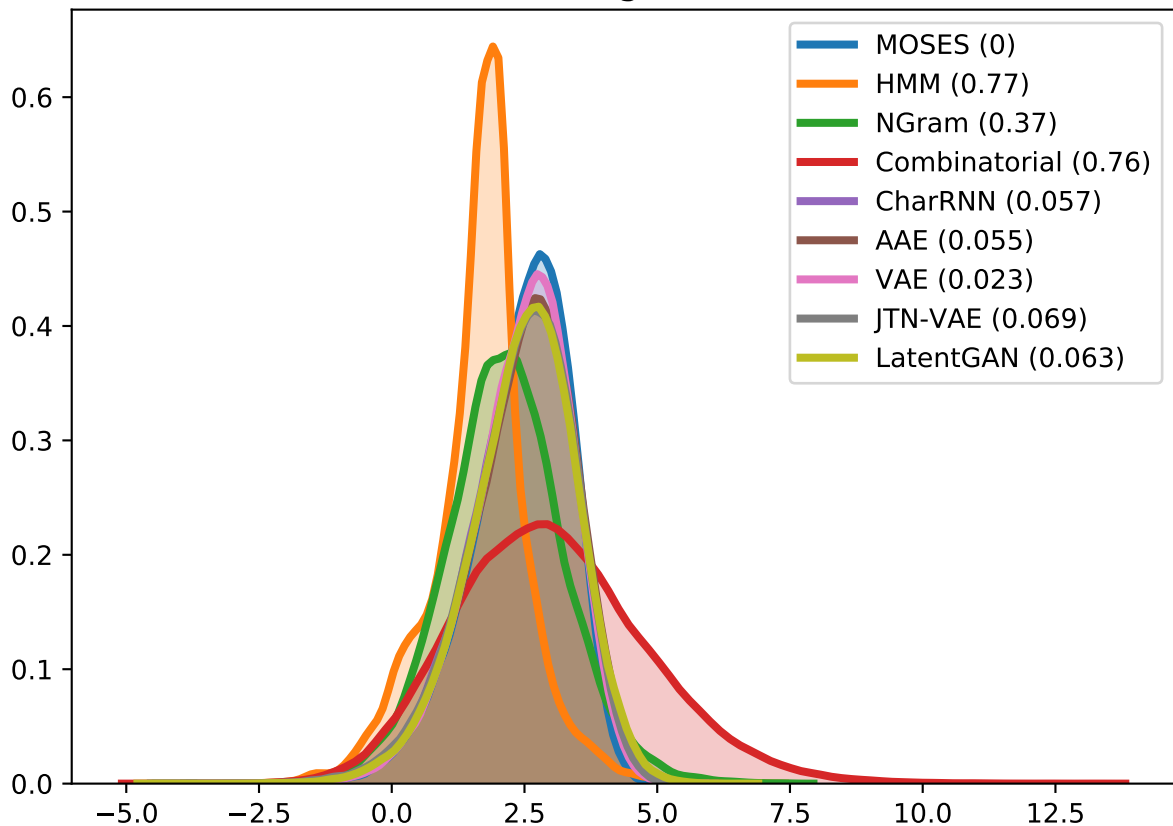

Supplement: supplementary_material [file attachment]
